# Supplementary material for: Adherence to epidemiological measures and related knowledge and attitudes during the coronavirus disease 2019 epidemic in Croatia: a cross-sectional study
Source: PubMed Central journal article supplement (PMC7821367; doi:10.3325/cmj.2020.61.508), 2020-12

**Supplementary Figure 1.** Three phases of loosening epidemiological measures (12, 13)

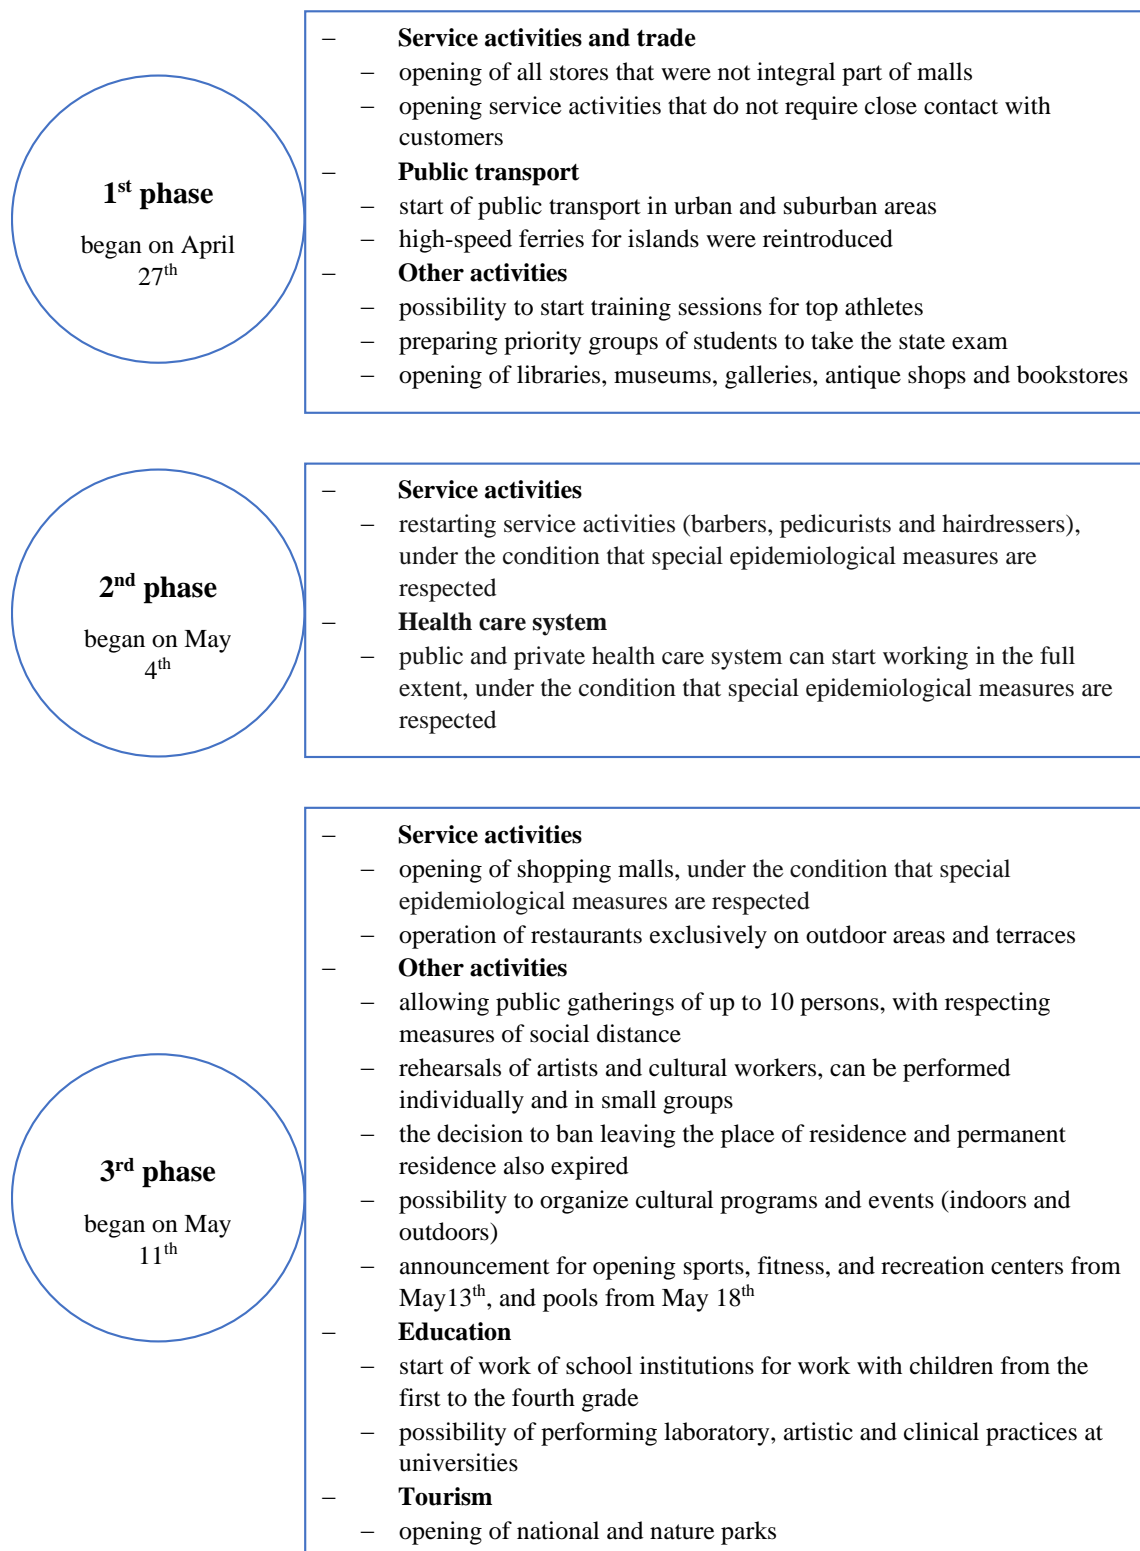

Supplement: CroatMedJ_61_s001.pdf [file CroatMedJ_61_s001.pdf]
