# Supplementary material for: Adherence to epidemiological measures and related knowledge and attitudes during the coronavirus disease 2019 epidemic in Croatia: a cross-sectional study
Source: PubMed Central journal article supplement (PMC7821367; doi:10.3325/cmj.2020.61.508), 2020-12
Supplement: CroatMedJ_61_s002.pdf [file CroatMedJ_61_s002.pdf]

**Supplemental table 1. Presentation of correct answers on knowledge questions according to Croatian Institute of Public Health (CIPH) (17-20).**

| No. | Questions                                                                                                                        | Correct answers | CIPH                                                                                                                                                                                                                                             |
|-----|----------------------------------------------------------------------------------------------------------------------------------|-----------------|--------------------------------------------------------------------------------------------------------------------------------------------------------------------------------------------------------------------------------------------------|
| 1.  | I need to replace the mask when it gets wet.                                                                                     | True            | The moistened mask should be removed and replaced with a new, dry one.                                                                                                                                                                           |
| 2.  | It is allowed to disinfect gloves with alcohol to keep them clean during use.                                                    | True            | Controllers in contact with passengers should wear disposable masks and gloves, which must be disinfected or replaced after the tram is changed.                                                                                                 |
| 3.  | Gloves protect against infection caused by contact.                                                                              | False           | Gloves give a false sense of security. If they don't change regularly, that wearing doesn't make sense, which means the virus needs to bring touching ears to contaminated gloves.                                                               |
| 4.  | Personal protective equipment should be used when driving in a personal vehicle with a person other than your household members. | True            | If the driver's wearing of the mask does not interfere with safe driving, it is advisable to wear the mask while driving.                                                                                                                        |
| 5.  | Gloves and masks may be used repeatedly.                                                                                         | False           | Gloves and masks may be used once.                                                                                                                                                                                                               |
| 6.  | Proper hand washing is one of the prevention measures from coronavirus infection.                                                | True            | Washing your hands with soap and water is a satisfactory measure of protection.                                                                                                                                                                  |
| 7.  | The mask protects against respiratory infection.                                                                                 | True            | The physical barrier we create by wearing a mask can help reduce the spread of infection by providing us with protection from larger droplets that may contain the virus and preventing contact between contaminated hands and mucous membranes. |
| 8.  | Personal protective equipment should be used when driving a personal vehicle (when you are alone in the car).                    | False           | There is no need to wear a mask when you are alone in the car.                                                                                                                                                                                   |
| 9.  | Cotton masks have the same protection effectiveness as the standard surgical masks.                                              | False           | Cotton masks slow down the flow of respiratory drops, while surgical masks protect others from the respiratory drops of the person wearing the mask.                                                                                             |
| 10. | When I put on the mask, it should cover both the nose and the mouth.                                                             | True            | The mask should cover the mouth, nose and part of the face.                                                                                                                                                                                      |
| 11. | I should use a mask and gloves every time I leave the house.                                                                     | False           | Persons without respiratory symptoms do not need personal protective equipment.                                                                                                                                                                  |
| 12. | It is necessary to perform hygienic hand washing after removing protective gloves.                                               | True            | Wash your hands thoroughly with soap before and after applying protective equipment.                                                                                                                                                             |
| 13. | Personal protective equipment should be used when using public transport.                                                        | True            | Passengers are advised to use a mask while driving, if they do not mind breathing due to their health condition.                                                                                                                                 |
