# Supplementary material for: Adherence to epidemiological measures and related knowledge and attitudes during the coronavirus disease 2019 epidemic in Croatia: a cross-sectional study
Source: PubMed Central journal article supplement (PMC7821367; doi:10.3325/cmj.2020.61.508), 2020-12
Supplement: CroatMedJ_61_s003.pdf [file CroatMedJ_61_s003.pdf]

**Supplemental table 2. Factor analysis of the items in the attitudes questionnaire towards personal protective equipment use**

|                                                                                                 | <b>Factor loadings</b> | <b>Item total correlation</b> |
|-------------------------------------------------------------------------------------------------|------------------------|-------------------------------|
| I consider that hygienic hand washing can reduce the risk of infection with novel coronavirus.  | 0.592                  | 0.531                         |
| I maintain social distance and I use protective equipment (masks or gloves).                    | 0.716                  | 0.672                         |
| Gloves and a mask protect against diseases caused by novel coronavirus.                         | 0.622                  | 0.578                         |
| Regardless of the price, I always buy enough protective equipment.                              | 0.644                  | 0.608                         |
| Healthcare professionals have a higher risk for infection with COVID-19.                        | 0.594                  | 0.538                         |
| I feel safe when I wear a mask or gloves.                                                       | 0.676                  | 0.639                         |
| Without protective equipment, I am not going to shop for groceries and hygiene products.        | 0.607                  | 0.571                         |
| Protective equipment is extremely important in my environment (business, family etc.).          | 0.682                  | 0.645                         |
| Compliance with social distance is one of the best measures to prevent the spread of infection. | 0.691                  | 0.632                         |
| Persons suffering from chronic disease should be advised to wear protective equipment           | 0.579                  | 0.525                         |
